# Supplementary material for: LncRNAs as an intermediate in HPV16 promoting myeloid-derived suppressor cell recruitment of head and neck squamous cell carcinoma
Source: PubMed Central journal article supplement (PMC5522049; doi:10.18632/oncotarget.14939), 2017-02-01
Supplement: oncotarget-08-42061-s001.pdf [file oncotarget-08-42061-s001.pdf]

# LncRNAs as an intermediate in HPV16 promoting myeloid-derived suppressor cell recruitment of head and neck squamous cell carcinoma

## SUPPLEMENTARY MATERIALS

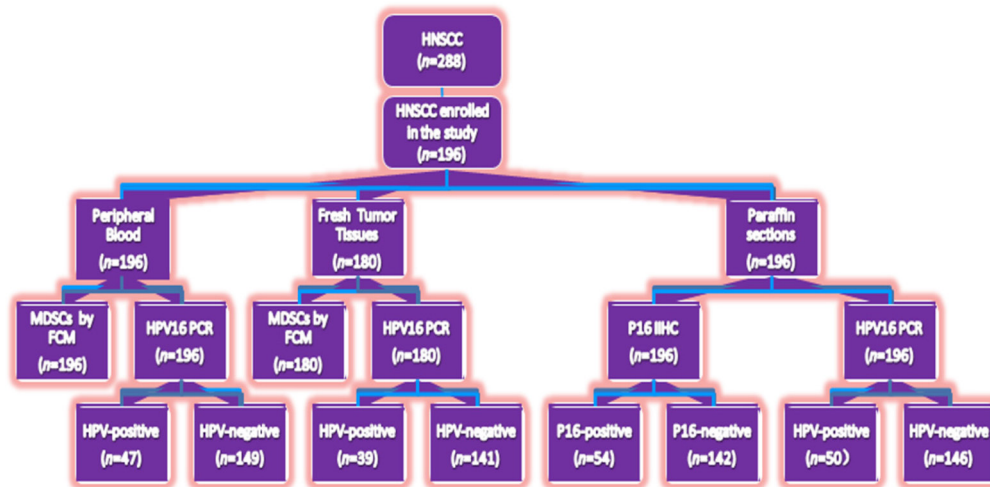

Supplementary Figure 1: Schematic diagram of this study.

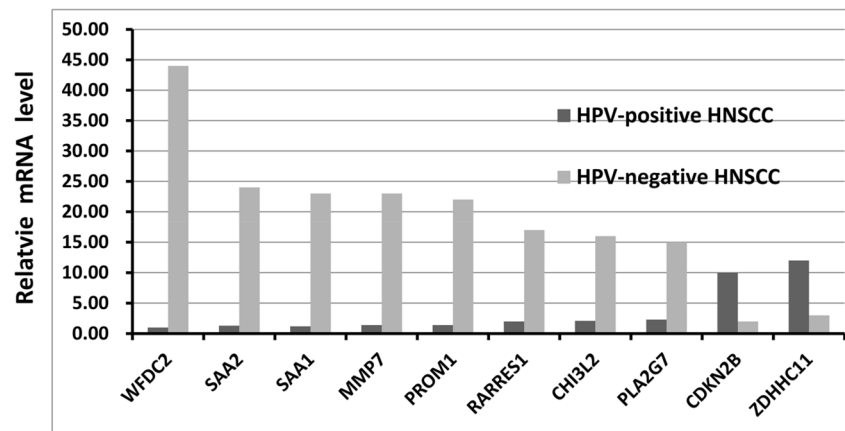

**Supplementary Figure 2: qRT-PCR validation of 10 differentially expressed mRNAs.** The relative expression levels of top 10 mRNAs in HPV-positive and HPV-negative HNSCC ( $P < 0.05$ ). The result showed the same trends of regulation as the microarray data.

Supplementary Table 1: The concordance of HPV16 by PCR and P16 IHC in peripheral blood and tumor tissues

| HPV Markers                                | Status   | HPV 16 DNA (fresh tumor tissues) by PCR |              | Kappa | P value |
|--------------------------------------------|----------|-----------------------------------------|--------------|-------|---------|
|                                            |          | Positive(n%)                            | Negative(n%) |       |         |
| HPV 16 DNA<br>(peripheral<br>blood) by PCR | Positive | 34(87.2)                                | 11(7.8)      | 0.80  | 0.000   |
|                                            | Negative | 5(12.8)                                 | 130(92.2)    |       |         |
| HPV 16 DNA<br>(paraffin section)<br>by PCR | Positive | 30(76.9)                                | 10(7.1)      | 0.88  | 0.000   |
|                                            | Negative | 9(23.1)                                 | 131(92.9)    |       |         |
| P 16 (paraffin<br>section) by IHC          | Positive | 34(87.2)                                | 18(12.8)     | 0.66  | 0.040   |
|                                            | Negative | 5(12.8)                                 | 123(87.2)    |       |         |

**Supplementary Table 2: The expression of MPO in HNSCC patients by ICH and its association with clinicopathologic characteristics**

| Variable                  | <i>n</i> | MPO      |          | <i>P</i> -value |
|---------------------------|----------|----------|----------|-----------------|
|                           |          | Negative | Positive |                 |
| <b>Age</b>                |          |          |          | 0.566           |
| <60                       | 89       | 43       | 46       |                 |
| ≥60                       | 107      | 57       | 50       |                 |
| <b>Gender</b>             |          |          |          | 0.150           |
| Male                      | 111      | 62       | 49       |                 |
| Female                    | 85       | 38       | 47       |                 |
| <b>Clinical stage</b>     |          |          |          | 0.002           |
| T1-T2                     | 86       | 68       | 18       |                 |
| T3-T4                     | 110      | 32       | 78       |                 |
| <b>Pathological stage</b> |          |          |          | 0.001           |
| Grade I                   | 53       | 28       | 15       |                 |
| Grade II+ III             | 143      | 62       | 81       |                 |

**Supplementary Table 3: The number of MDSCs in HNSCC patients, precancerous lesions and normal oral mucous tissues by FCM**

| <b>Group</b>               | <b><i>n</i></b> | <b>MDSCs in peripheral blood(%)</b> | <b><i>P</i> value</b> | <b><i>n</i></b> | <b>MDSCs in tumor tissue(%)</b> | <b><i>P</i> value</b> |
|----------------------------|-----------------|-------------------------------------|-----------------------|-----------------|---------------------------------|-----------------------|
| HPV-positive HNSCC         | 47              | 13.84 ± 1.66                        | 0.004                 | 39              | 15.78± 2.64                     | <0.001                |
| Precancerous lesions       | 30              | 4.12±0.96                           |                       | 30              | 5.12±1.47                       |                       |
| Normal oral mucous tissues | 30              | 0.83±1.25                           |                       | 30              | 0.67±2.14                       |                       |
